# Supplementary material for: Failure to Eliminate Persistent Anaplasma marginale Infection from Cattle Using Labeled Doses of Chlortetracycline and Oxytetracycline Antimicrobials
Source: MDPI journal article supplement (doi:10.3390/vetsci8110283), 2021-11-20
Supplement: s1 [file s1]

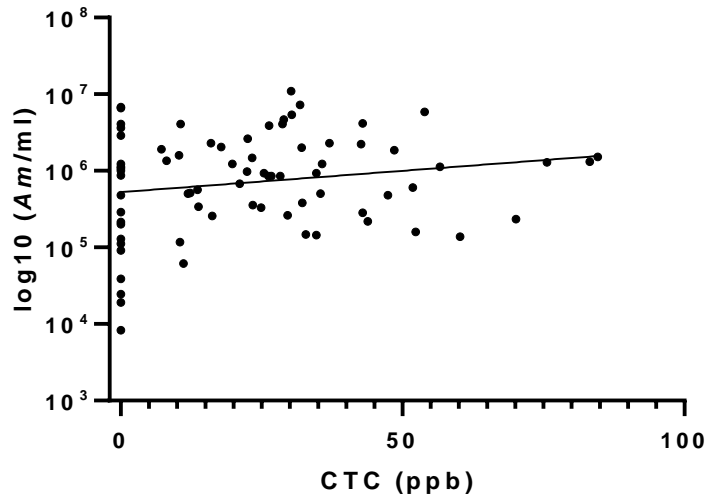

**Supplementary Figure S1. Relationship between *Am* bacteremia and drug concentration in steers treated with chlortetracycline (CTC) for 60 days.** Bacteremia (*Am*/mL blood) for animals treated with CTC is plotted by CTC concentration, in parts per billion (ppb). A straight line denotes linear regression ( $R^2 = 0.0348$ ,  $P = 0.1064$ ).

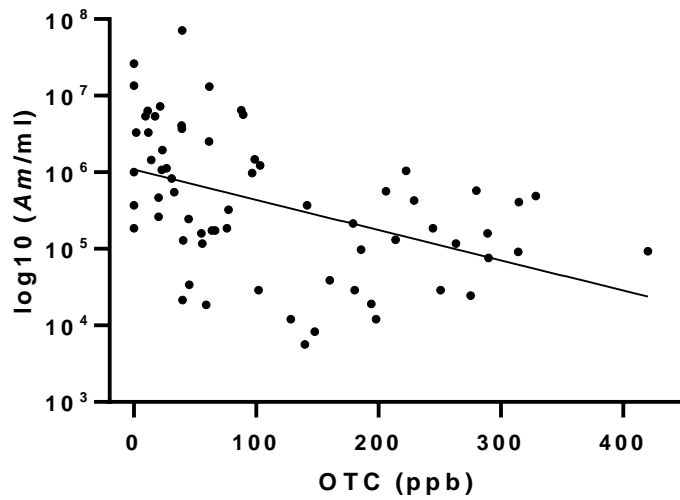

**Supplementary Figure S2. Relationship between *Am* bacteremia and drug concentration in steers treated with oxytetracycline (OTC).** Bacteremia (*Am*/mL blood) for animals treated with OTC is plotted by OTC concentration, in parts per billion (ppb). A straight line denotes linear regression ( $R^2 = 0.2033$ ,  $P = 0.0001$ ).
